# Supplementary material for: Epoxidation of methyl oleate with hydrogen peroxide. The use of Ti-containing silica solids as efficient heterogeneous catalysts
Source: Royal Society of Chemistry journal article supplement (doi:10.1039/c1gc15151g), 2011-01-01

## Supplementary Information

DRS-UV-Vis spectra of the calcined catalysts used in the epoxidation reaction are reported in Fig 1-SI.

5

**Figure 1-SI** DR-UV-Vis spectra of Ti/MCM-41, Ti/MCM-48 and Ti/Aerosil after calcination.

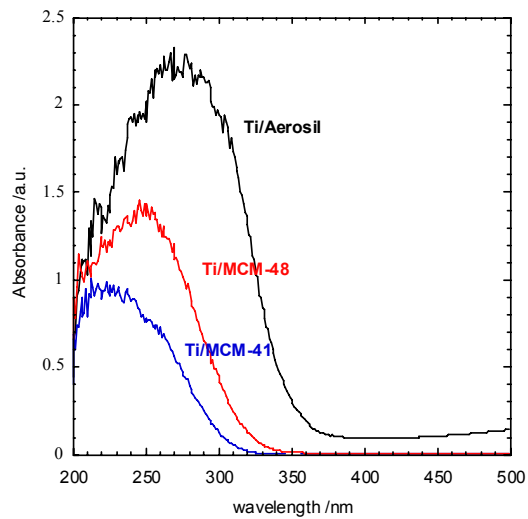

Supplement: c1gc15151g.pdf [file c1gc15151g.pdf]
